# Supplementary material for: Study of the Selectivity and Bioactivity of Polyphenols Using Infrared Assisted Extraction from Apricot Pomace Compared to Conventional Methods
Source: MDPI journal article supplement (doi:10.3390/antiox7120174), 2018-11-27
Supplement: s1 [file s1]

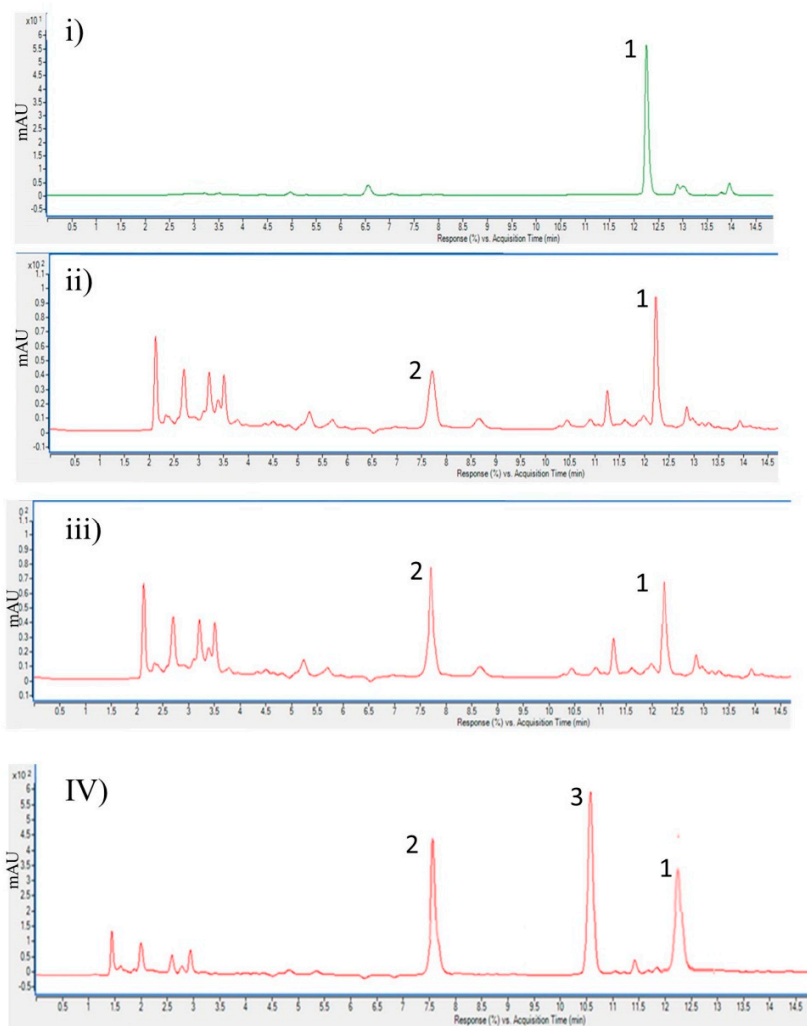

**Figure S1.** Chromatographic profile of the several phenolic compounds. 1: rutin, 2: catechin and 3: epicatechin of: i: solid-liquid, ii: ultrasound, iii: microwave and iv: infrared.
